# Supplementary material for: Fluorescent water-soluble molecular clips. Self-association and formation of adducts in aqueous and methanol solutions
Source: Royal Society of Chemistry journal article supplement (doi:10.1039/b812672k), 2008-10-22
Supplement: b812672k.pdf [file b812672k.pdf]

## Fluorescent water-soluble molecular clips. Self-association and formation of adducts in aqueous and methanol solution.

Barbara Branchi,<sup>a</sup> Paola Ceroni,<sup>a\*</sup> Vincenzo Balzani,<sup>a</sup> Marçal Casas Cartagena<sup>b</sup>, Frank-Gerrit Klärner<sup>b\*</sup>, Fritz Vögtle<sup>c\*</sup>

<sup>a</sup>Dipartimento di Chimica "G. Ciamician", Università di Bologna, via Selmi 2, I-40126 Bologna, Italy. Tel: +39 051 2099535; Fax: +39 051 2099456; E-mail: [paola.ceroni@unibo.it](mailto:paola.ceroni@unibo.it)

<sup>b</sup>Institut für Organische Chemie der Universität Duisburg-Essen, Campus Essen, Universitätsstr. 5, 45117 Essen, Germany; E-mail: [frank.klaerner@uni-duisburg-essen.de](mailto:frank.klaerner@uni-duisburg-essen.de)

### Supporting Information

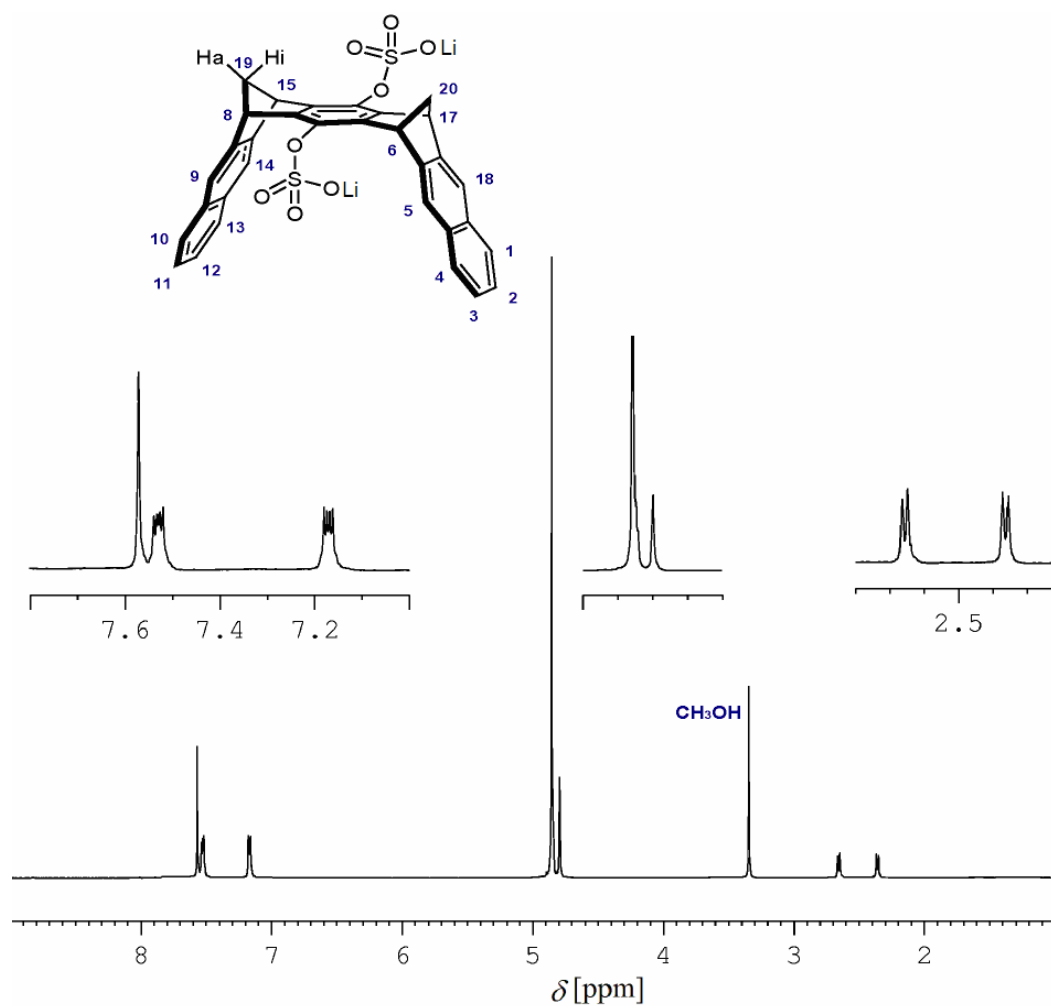

**Figure S1:** <sup>1</sup>H NMR spectrum of the naphthalene clip NC.

## Self-association of the anthracene clip AC at different temperatures

|           |                           |                |        |
|-----------|---------------------------|----------------|--------|
| Receptor: | AC                        | $M_R$ [g/mol]: | 742.72 |
| Solvent:  | D <sub>2</sub> O          | $m_R$ [mg]:    | 3.69   |
| $T$ [°C]: | 25                        | $V_0$ [mL]:    | 1.50   |
| Substrat: | Itself (self-association) | $[R]_0$ [mM]:  | 3.31   |

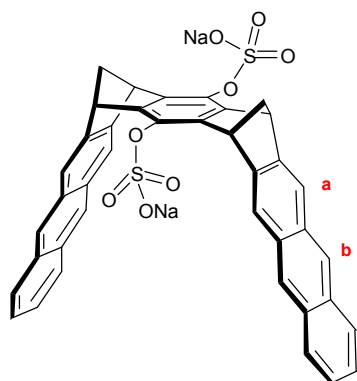

$$\delta_0 (H_a) \text{ [ppm]} = 7.7140$$

$$\delta_0 (H_b) \text{ [ppm]} = 8.0915$$

| $[R]_0$ [M] | $\delta_{\text{obs}} (H_a)$ [ppm] | $\Delta\delta_{\text{obs}} (H_a)$ [ppm] | $\Delta\delta_{\text{calc}} (H_a)$ [ppm] |
|-------------|-----------------------------------|-----------------------------------------|------------------------------------------|
| 0.00331214  | 6.6431                            | 1.0709                                  | 1.0729                                   |
| 0.00165607  | 6.6535                            | 1.0605                                  | 1.0606                                   |
| 0.00082803  | 6.6669                            | 1.0471                                  | 1.0434                                   |
| 0.00041402  | 6.6914                            | 1.0226                                  | 1.0195                                   |
| 0.00027601  | 6.7189                            | 0.9951                                  | 1.0016                                   |
| 0.00013801  | 6.7500                            | 0.9640                                  | 0.9623                                   |

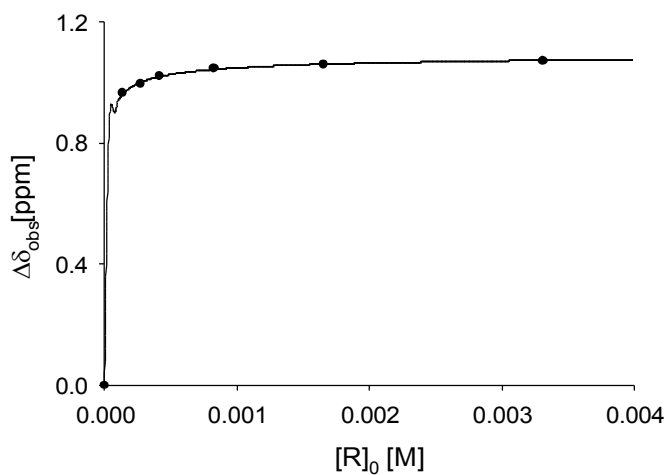

$$K_{\text{dim}} [\text{M}^{-1}] = (1.94 \pm 0.2) \cdot 10^5$$

$$\Delta\delta_{\text{max}} (H_a) \text{ [ppm]} = 1.10$$

$$\Delta\delta_{\text{max}} (H_b) \text{ [ppm]} = 2.26$$

$T$  [°C]: 45

| $[R]_0$ [M] | $\delta_{\text{obs}} (H_a)$ [ppm] | $\Delta\delta_{\text{obs}} (H_a)$ [ppm] | $\Delta\delta_{\text{calc}} (H_a)$ [ppm] |
|-------------|-----------------------------------|-----------------------------------------|------------------------------------------|
| 0.00331214  | 6.6756                            | 1.0384                                  | 1.0437                                   |
| 0.00165607  | 6.6936                            | 1.0204                                  | 1.0212                                   |
| 0.00082803  | 6.7197                            | 0.9943                                  | 0.9902                                   |
| 0.00041402  | 6.7621                            | 0.9519                                  | 0.9480                                   |
| 0.00027601  | 6.7936                            | 0.9204                                  | 0.9168                                   |
| 0.00013801  | 6.8692                            | 0.8448                                  | 0.8505                                   |

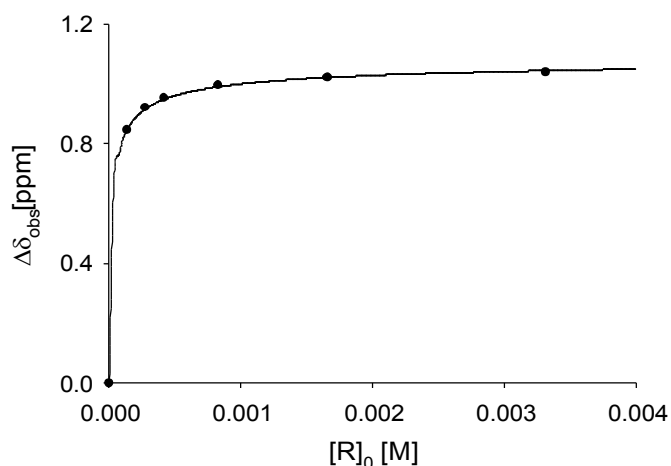

$$K_{\text{dim}} [\text{M}^{-1}] = (5.44 \pm 0.5) \cdot 10^4$$

$$\Delta\delta_{\text{max}} (\text{H}_a) [\text{ppm}] = 1.10$$

$$\Delta\delta_{\text{max}} (\text{H}_b) [\text{ppm}] = 2.33$$

$T [^{\circ}\text{C}]$ : 65

| $[\text{R}]_0 [\text{M}]$ | $\delta_{\text{obs}} (\text{H}_a) [\text{ppm}]$ | $\Delta\delta_{\text{obs}} (\text{H}_a) [\text{ppm}]$ | $\Delta\delta_{\text{calc}} (\text{H}_a) [\text{ppm}]$ |
|---------------------------|-------------------------------------------------|-------------------------------------------------------|--------------------------------------------------------|
| 0.00331214                | 6.7289                                          | 0.9851                                                | 0.9864                                                 |
| 0.00165607                | 6.7650                                          | 0.9490                                                | 0.9488                                                 |
| 0.00082803                | 6.8125                                          | 0.9015                                                | 0.8982                                                 |
| 0.00041402                | 6.8858                                          | 0.8282                                                | 0.8313                                                 |
| 0.00027601                | 6.9295                                          | 0.7845                                                | 0.7836                                                 |
| 0.00331214                | 6.7289                                          | 0.9851                                                | 0.9864                                                 |

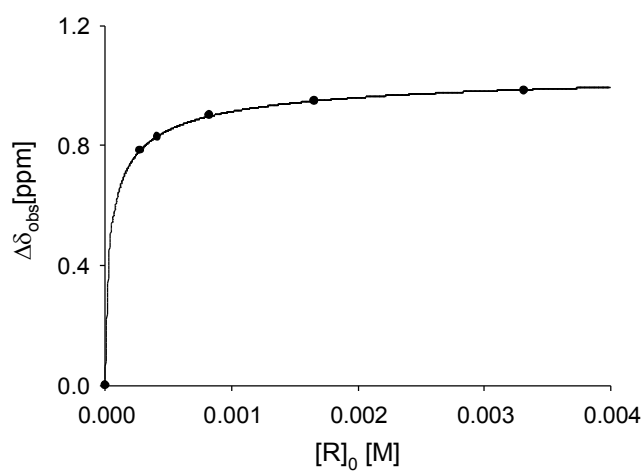

$$K_{\text{dim}} [\text{M}^{-1}] = (1.71 \pm 0.2) \cdot 10^4$$

$$\Delta\delta_{\text{max}} (\text{H}_a) [\text{ppm}] = 1.08$$

$$\Delta\delta_{\text{max}} (\text{H}_b) [\text{ppm}] = 2.34$$

$T [^{\circ}\text{C}]$ : 85

| $[\text{R}]_0 [\text{M}]$ | $\delta_{\text{obs}} (\text{H}_a) [\text{ppm}]$ | $\Delta\delta_{\text{obs}} (\text{H}_a) [\text{ppm}]$ | $\Delta\delta_{\text{calc}} (\text{H}_a) [\text{ppm}]$ |
|---------------------------|-------------------------------------------------|-------------------------------------------------------|--------------------------------------------------------|
| 0.00331214                | 6.8072                                          | 0.9068                                                | 0.9066                                                 |
| 0.00165607                | 6.8642                                          | 0.8498                                                | 0.8489                                                 |
| 0.00082803                | 6.9406                                          | 0.7734                                                | 0.7737                                                 |
| 0.00041402                | 7.0364                                          | 0.6776                                                | 0.6794                                                 |
| 0.00027601                | 7.0986                                          | 0.6154                                                | 0.6157                                                 |

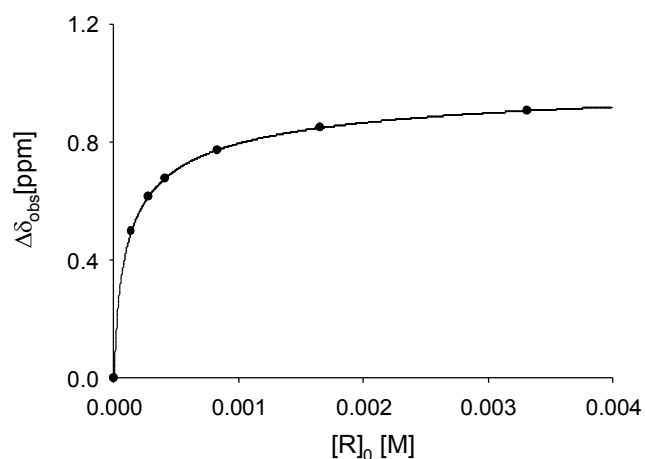

$$K_{\text{dim}} [\text{M}^{-1}] = (5.91 \pm 0.6) \cdot 10^3$$

$$\Delta\delta_{\text{max}} (\text{H}_a) [\text{ppm}] = 1.06$$

$$\Delta\delta_{\text{max}} (\text{H}_b) [\text{ppm}] = 2.32$$

$T$  [°C]: 95

| $[R]_0$ [M] | $\delta_{\text{obs}} (\text{H}_a)$ [ppm] | $\Delta\delta_{\text{obs}} (\text{H}_a)$ [ppm] | $\Delta\delta_{\text{calc}} (\text{H}_a)$ [ppm] |
|-------------|------------------------------------------|------------------------------------------------|-------------------------------------------------|
| 0.00331214  | 6.8588                                   | 0.8552                                         | 0.8565                                          |
| 0.00165607  | 6.9179                                   | 0.7961                                         | 0.7882                                          |
| 0.00082803  | 7.0147                                   | 0.6993                                         | 0.7014                                          |
| 0.00041402  | 7.1260                                   | 0.5880                                         | 0.5962                                          |
| 0.00027601  | 7.1915                                   | 0.5225                                         | 0.5275                                          |

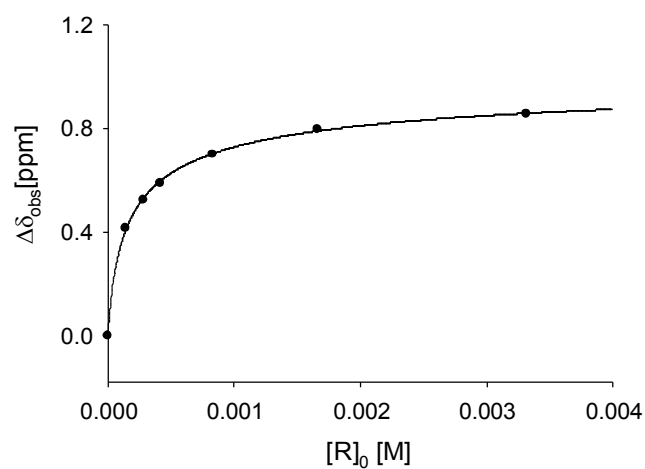

$$K_{\text{dim}} [\text{M}^{-1}] = (3.70 \pm 0.4) \cdot 10^3$$

$$\Delta\delta_{\text{max}} (\text{H}_a) [\text{ppm}] = 1.05$$

$$\Delta\delta_{\text{max}} (\text{H}_b) [\text{ppm}] = 2.31$$

## Self-association of the naphthalene clip NC at 25°C

|           |                           |                |        |
|-----------|---------------------------|----------------|--------|
| Receptor: | NC                        | $M_R$ [g/mol]: | 642.61 |
| Solvent:  | D <sub>2</sub> O          | $m_R$ [mg]:    | 9.70   |
| $T$ [°C]: | 25                        | $V_0$ [mL]:    | 1.50   |
| Substrat: | Itself (self-association) | $[R]_0$ [mM]:  | 10.07  |

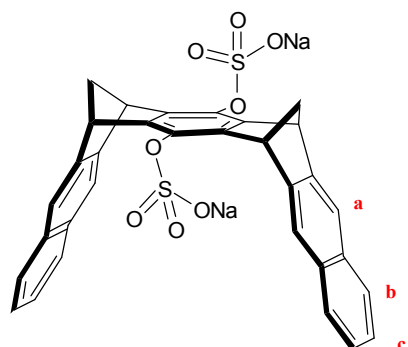

$$\delta_0(\text{H}_a) [\text{ppm}] = 7.8132$$

$$\delta_0(\text{H}_b) [\text{ppm}] = 7.7919$$

$$\delta_0(\text{H}_c) [\text{ppm}] = 7.4324$$

| $[R]_0$ [M] | $\delta_{\text{obs}}(\text{H}_b)$ [ppm] | $\Delta\delta_{\text{obs}}(\text{H}_b)$ [ppm] | $\Delta\delta_{\text{calc}}(\text{H}_b)$ [ppm] |
|-------------|-----------------------------------------|-----------------------------------------------|------------------------------------------------|
| 0.01475     | 7.2525                                  | 0.5394                                        | 0.5195                                         |
| 0.007377    | 7.3612                                  | 0.4307                                        | 0.4421                                         |
| 0.003688    | 7.4640                                  | 0.3279                                        | 0.3541                                         |
| 0.001844    | 7.5303                                  | 0.2616                                        | 0.2626                                         |
| 0.000922    | 7.5777                                  | 0.2142                                        | 0.2117                                         |
| 0.0004611   | 7.6630                                  | 0.1502                                        | 0.1170                                         |

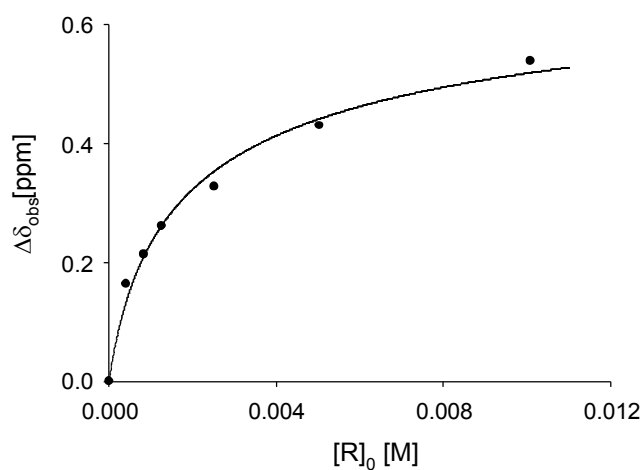

$$K_{\text{dim}} [\text{M}^{-1}] = 310 \pm 30$$

$$\Delta\delta_{\text{max}}(\text{H}_a) [\text{ppm}] = 0.60$$

$$\Delta\delta_{\text{max}}(\text{H}_b) [\text{ppm}] = 0.77$$

$$\Delta\delta_{\text{max}}(\text{H}_c) [\text{ppm}] = 0.63$$

## Binding of NAD<sup>+</sup> by the naphthalene clip NC at 25°C

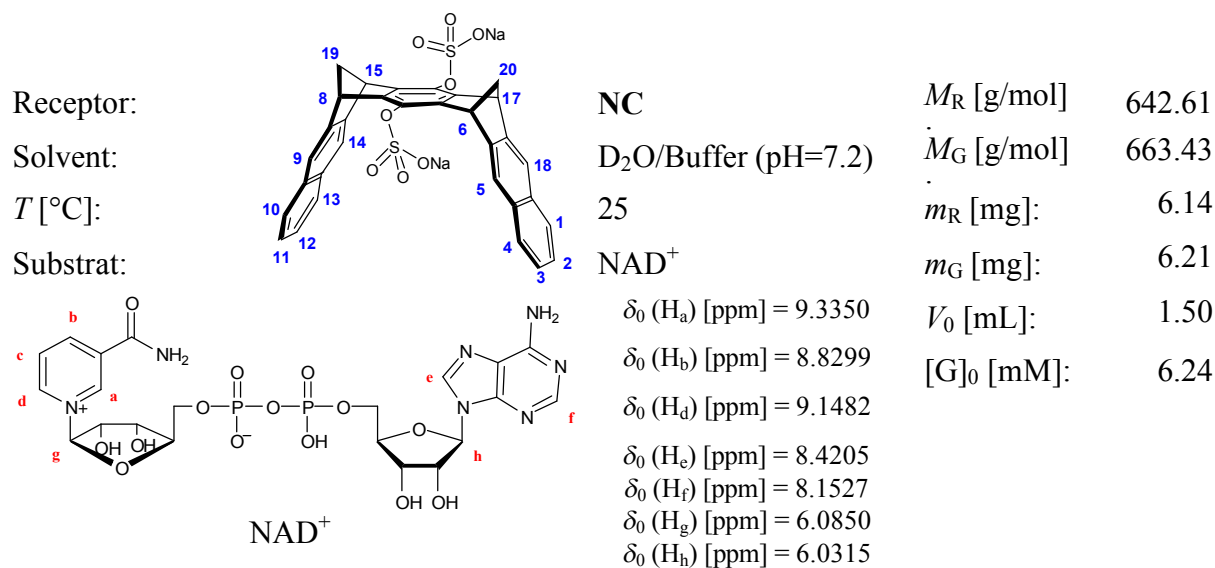

| [R] <sub>0</sub> [M] | [G] <sub>0</sub> [M] | $\delta_{\text{obs}}$ (H <sub>b</sub> ) [ppm] | $\Delta\delta_{\text{obs}}$ (H <sub>b</sub> ) [ppm] | $\Delta\delta_{\text{calc}}$ (H <sub>b</sub> ) [ppm] |
|----------------------|----------------------|-----------------------------------------------|-----------------------------------------------------|------------------------------------------------------|
| 0.006370             | 0.00842              | 7.5960                                        | 1.2339                                              | 1,2386                                               |
| 0.003185             | 0.00470              | 7.7440                                        | 1.0859                                              | 1,0859                                               |
| 0.001592             | 0.00235              | 7.9224                                        | 0.9075                                              | 0,9004                                               |
| 0.000796             | 0.00118              | 8.1292                                        | 0.7007                                              | 0,6951                                               |
| 0.000531             | 0.00079              | 8.2566                                        | 0.5733                                              | 0,5747                                               |
| 0.000265             | 0.00039              | 8.4536                                        | 0.3763                                              | 0,3860                                               |

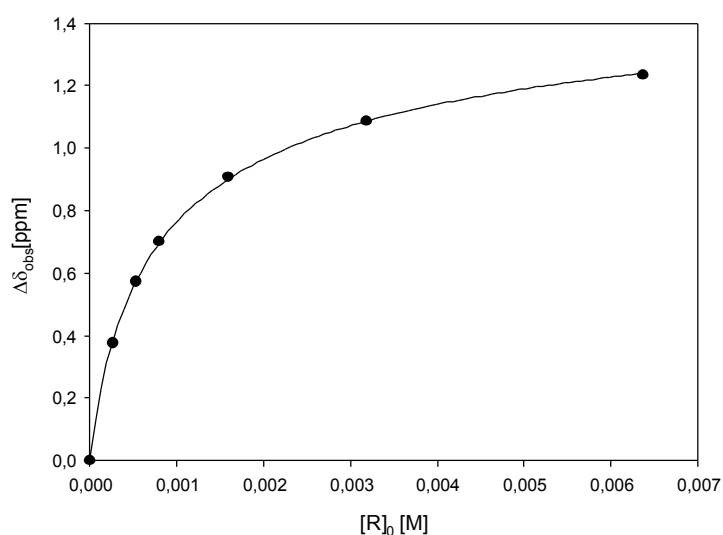

$K_a$  [M<sup>-1</sup>] = 1200 ± 30  
 $\Delta\delta_{\text{max}}$  (H<sub>a</sub>) [ppm] = 0.95  
 $\Delta\delta_{\text{max}}$  (H<sub>b</sub>) [ppm] = 2.06  
 $\Delta\delta_{\text{max}}$  (H<sub>c</sub>) [ppm] = 2.89  
 $\Delta\delta_{\text{max}}$  (H<sub>d</sub>) [ppm] = 1.55  
 $\Delta\delta_{\text{max}}$  (H<sub>e</sub>) [ppm] = 0.22  
 $\Delta\delta_{\text{max}}$  (H<sub>f</sub>) [ppm] = 0.36  
 $\Delta\delta_{\text{max}}$  (H<sub>g</sub>) [ppm] = 0.22  
 $\Delta\delta_{\text{max}}$  (H<sub>h</sub>) [ppm] = 0.37

NAD<sup>+</sup>•NC <sup>1</sup>H NMR (500MHz, D<sub>2</sub>O/Buffer)  $\delta$ [ppm]: 2.47 (dd, 2H, H-19a+H-20a), 2.70 (d, 2H, H-19i+H-20i), 4.74 (s, 4H, H-6+H-8+H-15+H-17), 5.66 (d, 1H, NAD<sup>+</sup>, H<sub>h</sub>), 5.87 (d, 1H, NAD<sup>+</sup>, H<sub>g</sub>), 6.91 (dd, 4H, H-2+H-3+H-12+H-11), 7.08 (dd, 4H, H-1+H-4+H-10+H-13), 6.77 (d, 1H, NAD<sup>+</sup>, H<sub>b</sub>), 7.30 (s, 4H, H-5+H-9+H-14+H-18), 7.79 (s, 1H, NAD<sup>+</sup>, H<sub>f</sub>), 7.60 (d, 1H, NAD<sup>+</sup>, H<sub>d</sub>), 8.18 (s, 1H, NAD<sup>+</sup>, H<sub>e</sub>), 8.38 (s, 1H, NAD<sup>+</sup>, H<sub>a</sub>)
